# Supplementary material for: Efficacy of Finasteride in Female Pattern Hair Loss: A Meta-Analysis
Source: PubMed Central journal article supplement — Ann Dermatol. 2021 May 4;33(3):304–7. doi: 10.5021/ad.2021.33.3.304 (PMC8137337; doi:10.5021/ad.2021.33.3.304), 2021-05-04
Supplement: ad-33-304-s001.pdf [file ad-33-304-s001.pdf]

## SEARCH STRATEGY

---

### MEDLINE and Embase

('alopecia'/exp OR alopecia OR 'alopecia':ti,ab OR 'baldness':ti,ab OR 'hairlessness':ti,ab OR 'androgenic alopecia'/exp OR 'hair loss'/exp OR 'hair loss':ti,ab OR 'pattern hair loss':ti,ab OR 'pattern baldness':ti,ab OR 'alopecia androgenetica':ti,ab) AND ('finasteride'/exp OR finasteride OR 'alocare' OR 'andozac' OR 'chibro proscar' OR 'chibro-proscar' OR 'finastar' OR 'finasteride' OR 'finastid' OR 'fincar' OR 'finired' OR 'finpro' OR 'fistrin' OR 'folians' OR 'frosst' OR 'genaprost' OR 'harifin' OR 'l 652931' OR 'l652931' OR 'mk 0906' OR 'mk 906' OR 'mk0906' OR 'mk906' OR 'n (2 methyl 2 propyl) 3 oxo 4 aza 5alpha androst 1 ene 17beta carboxamide' OR 'n tert butyl 3 oxo 4 aza 5alpha androst 1 ene 17beta carboxamide' OR 'nasterol' OR 'pilus' OR 'pro-cure' OR 'prohair' OR 'propecia' OR 'propeshia' OR 'proscar' OR 'proscar 5' OR 'prosh' OR 'prostacare' OR 'prostacom' OR 'prostide' OR 'prostop' OR 'reprostom' OR 'symasteride' OR 'tensen' OR 'uromedin' OR 'ym 152' OR 'ym152') AND ('female'/exp OR female OR 'female':ti,ab OR 'females':ti,ab OR 'woman':ti,ab OR 'women':ti,ab)

### Cochrane Library

#1: 'alopecia':ti OR 'alopecia androgenetica':ti OR 'Androgenic alopecia':ti OR 'hair loss':ti OR 'pattern hair loss':ti OR 'pattern baldness':ti

#2: 'female':ti OR 'females':ti OR 'women':ti OR 'woman':ti

#3: 'finasteride':ti OR '5 $\alpha$  reductase inhibitor':ti OR 'proscar':ti OR 'propecia':ti OR 'finastar':ti OR 'fincar':ti OR 'alocare':ti OR 'andozac':ti OR 'genaprost':ti

Final query: #1 AND #2 AND #3

## REFERENCES

---

1. Iorizzo M, Vincenzi C, Voudouris S, Piraccini BM, Tosti A. Finasteride treatment of female pattern hair loss. *Arch Dermatol* 2006; 142:298-302.
2. Keene S, Goren A. Therapeutic hotline. Genetic variations in the androgen receptor gene and finasteride response in women with androgenetic alopecia mediated by epigenetics. *Dermatol Ther* 2011;24:296-300.
3. Kim WJ, Song M, Ko HC, Kim BS, Kim MB. Efficacy of finasteride 1.25 mg on female pattern hair loss; pilot study. *Ann Dermatol* 2012;24:370-372.
4. Oliveira-Soares R, E Silva JM, Correia MP, André MC. Finasteride 5 mg/day treatment of patterned hair loss in normo-androgenetic postmenopausal women. *Int J Trichology* 2013;5:22-25.
5. Whiting DA, Waldstreicher J, Sanchez M, Kaufman KD. Measuring reversal of hair miniaturization in androgenetic alopecia by follicular counts in horizontal sections of serial scalp biopsies: results of finasteride 1 mg treatment of men and postmenopausal women. *J Investig Dermatol Symp Proc* 1999;4:282-284.
6. Won YY, Lew BL, Sim WY. Clinical efficacy of oral administration of finasteride at a dose of 2.5 mg/day in women with female pattern hair loss. *Dermatol Ther* 2018;31:e12588.
7. Yeon JH, Jung JY, Choi JW, Kim BJ, Youn SW, Park KC, et al. 5 mg/day finasteride treatment for normoandrogenic Asian women with female pattern hair loss. *J Eur Acad Dermatol Venereol* 2011;25:211-214.
8. Yamazaki M, Sato A, Toyoshima KE, Kojima Y, Okada T, Ishii Y, et al. Polymorphic CAG repeat numbers in the androgen receptor gene of female pattern hair loss patients. *J Dermatol* 2011;38:680-684.
