# Supplementary material for: Efficacy of Finasteride in Female Pattern Hair Loss: A Meta-Analysis
Source: PubMed Central journal article supplement — Ann Dermatol. 2021 May 4;33(3):304–7. doi: 10.5021/ad.2021.33.3.304 (PMC8137337; doi:10.5021/ad.2021.33.3.304), 2021-05-04
Supplement: ad-33-304-s002.pdf [file ad-33-304-s002.pdf]

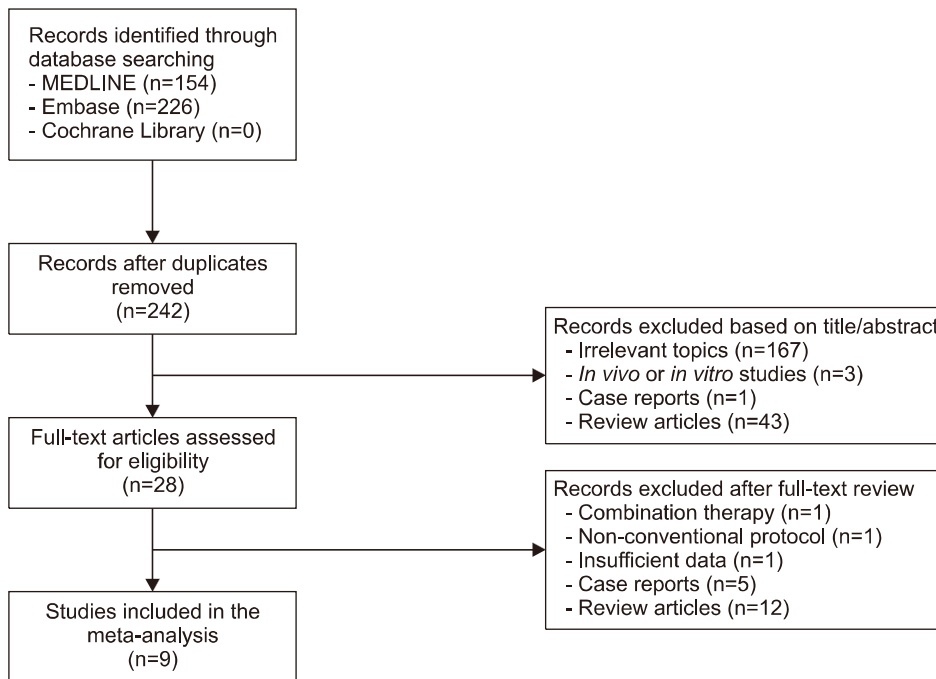

**Supplementary Fig. 1.** PRISMA flow diagram of literature search and study selection for the systematic review of studies on finasteride administration for female pattern hair loss.
